# Supplementary material for: Advanced 3D Imaging of Uterine Leiomyoma’s Morphology by Propagation-based Phase-Contrast Microtomography
Source: PubMed Central journal article supplement (PMC6646365; doi:10.1038/s41598-019-47048-0), 2019-07-22
Supplement: 41598_2019_47048_MOESM1_ESM.pdf [file 41598_2019_47048_MOESM1_ESM.pdf]

# Advanced 3D Imaging of Uterine Leiomyoma's Morphology by Propagation-based Phase-Contrast Microtomography

Alessandra Giuliani<sup>1</sup>, Stefania Greco<sup>2</sup>, Serena Pacilè<sup>3</sup>, Alessandro Zannotti<sup>2</sup>, Giovanni Delli Carpini<sup>1</sup>, Giuliana Tromba<sup>3</sup>, Stefano Raffaele Giannubilo<sup>1</sup>, Andrea Ciavattini<sup>1</sup>, Pasquapina Ciarmela<sup>2</sup>

<sup>1</sup>Department of Clinical Science, Università Politecnica delle Marche, Ancona, Italy.

<sup>2</sup>Department of Experimental and Clinical Medicine, Università Politecnica delle Marche, Ancona, Italy.

<sup>3</sup>Elettra Sincrotrone Trieste S.C.p.A, Trieste, Italy.

## Abstract

Supplementary material for the article submitted to Nature Scientific Reports. This material presents an example of slice thresholding by the Mixture Modeling Algorithm and movies related to microCT stack-sequences of 2D axial slices for healthy myometrium and leiomyoma tissues.

## Supplementary material

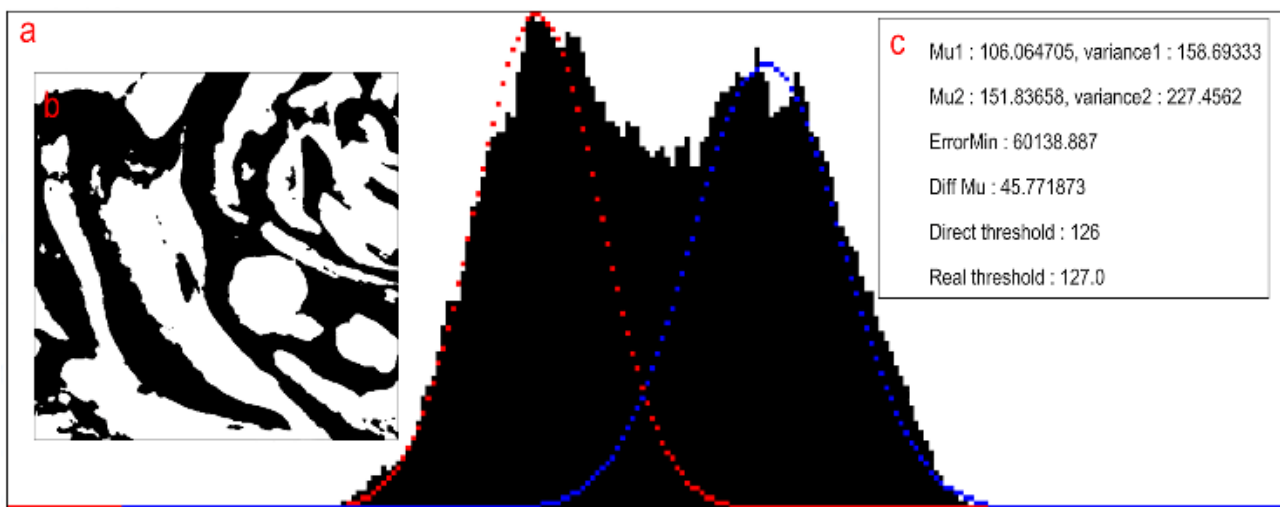

**Figure 4.**

Example (from P1-L biopsies) of slice thresholding by the Mixture Modeling Algorithm. The applied ImageJ plugin returns: (a) a histogram with two Gaussians (from left to right, the smooth muscle and the collagen phases), (b) the thresholded image and (c) the parameters obtained (average, standard deviation, and threshold).

**Movie 1**

Mv.1. Healthy myometrium. MicroCT stack-sequence of 2D axial slices (final volume of  $600 \times 600 \times 400 \mu\text{m}^3$ ) for a representative sample of P1 (P1-Ctr).

**Movie 2**

Mv.2. Leiomyoma. MicroCT stack-sequence of 2D axial slices (final volume of  $600 \times 600 \times 400 \mu\text{m}^3$ ) for a representative sample of P1 (P1-L).
